# Supplementary material
Source: PubMed Central journal article supplement (PMC2762638)
Supplement: NIHMS149170-supplement-ESI.pdf [file NIHMS149170-supplement-ESI.pdf]

*Analytical and Bioanalytical Chemistry*

**Electronic Supplementary Information**

**Characterizing Ion Mobility-Mass Spectrometry Conformation Space for the Analysis of Complex Biological Samples**

Larissa S. Fenn, Michal Kliman, Ablatt Mahsut, Sophie Zhao, and John A. McLean\*

**Table S1.** Biomolecular class species and collision cross sections reported in this work.

| Biomolecular Class                  | Name (parent name if fragmented)                      | species            | m/z (Da) | $\Omega$ ( $\text{\AA}^2$ ) | $\sigma$ (# of measurements) |
|-------------------------------------|-------------------------------------------------------|--------------------|----------|-----------------------------|------------------------------|
| <b>Oligonucleotides<sup>1</sup></b> |                                                       |                    |          |                             |                              |
| oligonucleotide                     | d2-G-H <sub>2</sub> O (GACT)                          | [M+H] <sup>+</sup> | 492.1    | 129.2                       | 0.3(6)                       |
| oligonucleotide                     | w2-G-H <sub>2</sub> O (TCAG)                          | [M+H] <sup>+</sup> | 492.1    | 137.7                       | 0.5(6)                       |
| oligonucleotide                     | w2-C-H <sub>2</sub> O (TGAC)                          | [M+H] <sup>+</sup> | 492.6    | 135.5                       | 0.4(6)                       |
| oligonucleotide                     | d2-C-H <sub>2</sub> O or x2-T-H <sub>2</sub> O (CAGT) | [M+H] <sup>+</sup> | 492.9    | 125.7                       | 0.5(6)                       |
| oligonucleotide                     | a2 (TCGA)                                             | [M+H] <sup>+</sup> | 514.1    | 134.3                       | 0.5(6)                       |
| oligonucleotide                     | a2 (TCAG)                                             | [M+H] <sup>+</sup> | 514.1    | 138.2                       | 0.3(6)                       |
| oligonucleotide                     | a2 (TCG)                                              | [M+H] <sup>+</sup> | 514.1    | 150.9                       | 0.4(6)                       |
| oligonucleotide                     | a2-T (ACTG)                                           | [M+H] <sup>+</sup> | 524.1    | 137.9                       | 0.5(6)                       |
| oligonucleotide                     | z2 or a2 (GCAT)                                       | [M+H] <sup>+</sup> | 539.1    | 141.6                       | 0.4(6)                       |
| oligonucleotide                     | w2 (GCT)                                              | [M+H] <sup>+</sup> | 610.1    | 154.9                       | 0.6(6)                       |
| oligonucleotide                     | w2 (GTC)                                              | [M+H] <sup>+</sup> | 612.1    | 145.5                       | 0.4(6)                       |
| oligonucleotide                     | c2 (GCT)                                              | [M+H] <sup>+</sup> | 618.1    | 163.1                       | 0.5(6)                       |
| oligonucleotide                     | w2 (TGAC)                                             | [M+H] <sup>+</sup> | 621.1    | 153.2                       | 0.6(6)                       |
| oligonucleotide                     | w2 (TGCA)                                             | [M+H] <sup>+</sup> | 621.1    | 156.7                       | 0.3(6)                       |
| oligonucleotide                     | w2 (CGTA)                                             | [M+H] <sup>+</sup> | 636.1    | 163.5                       | 0.1(6)                       |
| oligonucleotide                     | w2 (GCTA)                                             | [M+H] <sup>+</sup> | 636.1    | 165.1                       | 0.4(6)                       |
| oligonucleotide                     | w2 (CGAT)                                             | [M+H] <sup>+</sup> | 636.1    | 152                         | 0.4(6)                       |
| oligonucleotide                     | w2 (GCAT)                                             | [M+H] <sup>+</sup> | 636.1    | 153.7                       | 0.2(6)                       |
| oligonucleotide                     | w2 (ACTG)                                             | [M+H] <sup>+</sup> | 652.1    | 142.1                       | 0.7(6)                       |
| oligonucleotide                     | w2 (CTG)                                              | [M+H] <sup>+</sup> | 652.1    | 161.9                       | 0.2(6)                       |
| oligonucleotide                     | w2 (TCAG)                                             | [M+H] <sup>+</sup> | 661.1    | 158.4                       | 0.2(6)                       |
| oligonucleotide                     | TGC-G (TGC)                                           | [M+H] <sup>+</sup> | 710.2    | 171                         | 1.3(6)                       |
| oligonucleotide                     | GTC-G (GTC)                                           | [M+H] <sup>+</sup> | 710.2    | 172.5                       | 0.2(6)                       |
| oligonucleotide                     | GCT-G (GCT)                                           | [M+H] <sup>+</sup> | 710.2    | 176                         | 0.9(6)                       |
| oligonucleotide                     | a3-G (ATGC)                                           | [M+H] <sup>+</sup> | 716.2    | 171.7                       | 0.3(6)                       |
| oligonucleotide                     | a3-C (TACG)                                           | [M+H] <sup>+</sup> | 716.2    | 170.5                       | 0.4(6)                       |
| oligonucleotide                     | a3-G (TAGC)                                           | [M+H] <sup>+</sup> | 716.2    | 173.7                       | 0.3(6)                       |

|                 |                                         |                    |       |       |        |
|-----------------|-----------------------------------------|--------------------|-------|-------|--------|
| oligonucleotide | a3-C (ATCG)                             | [M+H] <sup>+</sup> | 716.2 | 172.2 | 0.1(6) |
| oligonucleotide | CGT-C (CGT)                             | [M+H] <sup>+</sup> | 750.2 | 170.9 | 0.3(6) |
| oligonucleotide | TCG-C (TCG)                             | [M+H] <sup>+</sup> | 750.2 | 182.9 | 1.0(6) |
| oligonucleotide | CTG-C (CTG)                             | [M+H] <sup>+</sup> | 750.2 | 176.3 | 1.3(6) |
| oligonucleotide | x3-G or w3-G-H <sub>2</sub> O<br>(CATG) | [M+H] <sup>+</sup> | 796.1 | 179.8 | 0.4(6) |
| oligonucleotide | x3-G or w3-G-H <sub>2</sub> O<br>(CTAG) | [M+H] <sup>+</sup> | 796.1 | 181.6 | 0.8(6) |
| oligonucleotide | c3-G or x3-C (GATC)                     | [M+H] <sup>+</sup> | 796.1 | 181.8 | 0.3(6) |
| oligonucleotide | c3-G (GTAC)                             | [M+H] <sup>+</sup> | 796.1 | 179.2 | 0.3(6) |
| oligonucleotide | w3-C (GACT)                             | [M+H] <sup>+</sup> | 814.1 | 156.1 | 0.4(6) |
| oligonucleotide | w3-G or d3-C (CATG)                     | [M+H] <sup>+</sup> | 814.1 | 179.5 | 0.7(6) |
| oligonucleotide | w3-G or d3-C (CTAG)                     | [M+H] <sup>+</sup> | 814.1 | 186.4 | 1.3(6) |
| oligonucleotide | d3-G or w3-C (GATC)                     | [M+H] <sup>+</sup> | 814.1 | 182   | 0.3(6) |
| oligonucleotide | d3-G or w3-C (GTAC)                     | [M+H] <sup>+</sup> | 814.1 | 183.1 | 0.3(6) |
| oligonucleotide | w3-G (CTGA)                             | [M+H] <sup>+</sup> | 814.1 | 170.4 | 0.8(6) |
| oligonucleotide | w3-C (GCAT)                             | [M+H] <sup>+</sup> | 814.1 | 180.3 | 0.4(6) |
| oligonucleotide | w3-C (GTCA)                             | [M+H] <sup>+</sup> | 814.1 | 172.1 | 0.8(6) |
| oligonucleotide | w3-G (CAGT)                             | [M+H] <sup>+</sup> | 814.3 | 172   | 0.7(6) |
| oligonucleotide | CGT                                     | [M+H] <sup>+</sup> | 861.2 | 187.6 | 0.6(6) |
| oligonucleotide | TCG                                     | [M+H] <sup>+</sup> | 861.2 | 186.1 | 0.4(6) |
| oligonucleotide | TGC                                     | [M+H] <sup>+</sup> | 861.2 | 190.2 | 0.3(6) |
| oligonucleotide | GTC                                     | [M+H] <sup>+</sup> | 861.2 | 187.2 | 0.1(6) |
| oligonucleotide | GCT                                     | [M+H] <sup>+</sup> | 861.2 | 198.3 | 0.1(6) |
| oligonucleotide | CTG                                     | [M+H] <sup>+</sup> | 861.2 | 190.5 | 0.2(6) |
| oligonucleotide | w3 (GCTA)                               | [M+H] <sup>+</sup> | 925.2 | 187.8 | 0.1(6) |
| oligonucleotide | w3 (GACT)                               | [M+H] <sup>+</sup> | 925.2 | 191.4 | 0.3(6) |
| oligonucleotide | w3 (GATC)                               | [M+H] <sup>+</sup> | 925.2 | 193.8 | 0.2(6) |
| oligonucleotide | w3 (GTAC)                               | [M+H] <sup>+</sup> | 925.2 | 197.3 | 0.1(6) |
| oligonucleotide | w3 (GCAT)                               | [M+H] <sup>+</sup> | 925.2 | 200.6 | 0.5(6) |
| oligonucleotide | w3 (GTCA)                               | [M+H] <sup>+</sup> | 925.2 | 202.3 | 0.2(6) |
| oligonucleotide | w3 (CAGT)                               | [M+H] <sup>+</sup> | 965.2 | 197.9 | 0.5(6) |
| oligonucleotide | w3 (CGTA)                               | [M+H] <sup>+</sup> | 965.2 | 193   | 0.6(6) |
| oligonucleotide | W3 (ACTG)                               | [M+H] <sup>+</sup> | 965.2 | 199.1 | 0.3(6) |

|                 |               |                    |        |       |        |
|-----------------|---------------|--------------------|--------|-------|--------|
| oligonucleotide | w3 (CTAG)     | [M+H] <sup>+</sup> | 965.2  | 191.2 | 0.5(6) |
| oligonucleotide | w3 (CGAT)     | [M+H] <sup>+</sup> | 965.2  | 200.5 | 0.3(6) |
| oligonucleotide | w3 (CTGA)     | [M+H] <sup>+</sup> | 965.2  | 202.6 | 0.3(6) |
| oligonucleotide | GACT-G (GACT) | [M+H] <sup>+</sup> | 1023.2 | 211.9 | 0.4(6) |
| oligonucleotide | GCTA-G (GCTA) | [M+H] <sup>+</sup> | 1023.2 | 209.2 | 0.8(6) |
| oligonucleotide | GATC-G (GATC) | [M+H] <sup>+</sup> | 1023.2 | 212.5 | 0.4(6) |
| oligonucleotide | GTAC-G (GTAC) | [M+H] <sup>+</sup> | 1023.2 | 211.4 | 0.5(6) |
| oligonucleotide | GCAT-G (GCAT) | [M+H] <sup>+</sup> | 1023.2 | 215   | 0.6(6) |
| oligonucleotide | GTCA-G (GTCA) | [M+H] <sup>+</sup> | 1023.2 | 216.3 | 0.7(6) |
| oligonucleotide | ATGC-C (ATGC) | [M+H] <sup>+</sup> | 1063.2 | 213.2 | 0.6(6) |
| oligonucleotide | CAGT-C (CAGT) | [M+H] <sup>+</sup> | 1063.2 | 214.4 | 0.8(6) |
| oligonucleotide | CGTA-C (CGTA) | [M+H] <sup>+</sup> | 1063.2 | 215.7 | 0.8(6) |
| oligonucleotide | CGAT-C (CGAT) | [M+H] <sup>+</sup> | 1063.2 | 216.3 | 0.7(6) |
| oligonucleotide | CGTA          | [M+H] <sup>+</sup> | 1174.2 | 234   | 0.5(6) |
| oligonucleotide | ACGT          | [M+H] <sup>+</sup> | 1174.3 | 219.3 | 0.3(6) |
| oligonucleotide | AGTC          | [M+H] <sup>+</sup> | 1174.3 | 214.3 | 0.4(6) |
| oligonucleotide | ATGC          | [M+H] <sup>+</sup> | 1174.3 | 232.3 | 0.3(6) |
| oligonucleotide | CAGT          | [M+H] <sup>+</sup> | 1174.3 | 220.7 | 0.5(6) |
| oligonucleotide | GCTA          | [M+H] <sup>+</sup> | 1174.3 | 223.1 | 0.7(6) |
| oligonucleotide | TACG          | [M+H] <sup>+</sup> | 1174.3 | 231.9 | 0.5(6) |
| oligonucleotide | GACT          | [M+H] <sup>+</sup> | 1174.3 | 228.6 | 0.2(6) |
| oligonucleotide | GCTA          | [M+H] <sup>+</sup> | 1174.3 | 223.3 | 0.6(6) |
| oligonucleotide | TCGA          | [M+H] <sup>+</sup> | 1174.3 | 217.2 | 0.5(6) |
| oligonucleotide | ACTG          | [M+H] <sup>+</sup> | 1174.3 | 227.4 | 0.4(6) |
| oligonucleotide | CATG          | [M+H] <sup>+</sup> | 1174.3 | 216.7 | 0.4(6) |
| oligonucleotide | CTAG          | [M+H] <sup>+</sup> | 1174.3 | 231.6 | 0.3(6) |
| oligonucleotide | GATC          | [M+H] <sup>+</sup> | 1174.3 | 210.7 | 0.4(6) |
| oligonucleotide | GTAC          | [M+H] <sup>+</sup> | 1174.3 | 224.1 | 0.3(6) |
| oligonucleotide | TAGC          | [M+H] <sup>+</sup> | 1174.3 | 220.3 | 0.4(6) |
| oligonucleotide | TGAC          | [M+H] <sup>+</sup> | 1174.3 | 224.3 | 0.4(6) |
| oligonucleotide | AGCT          | [M+H] <sup>+</sup> | 1174.3 | 232.4 | 0.5(6) |
| oligonucleotide | ATCG          | [M+H] <sup>+</sup> | 1174.3 | 226.2 | 0.6(6) |
| oligonucleotide | CGAT          | [M+H] <sup>+</sup> | 1174.3 | 215.4 | 0.4(6) |

|                                  |                                                |                     |        |       |         |
|----------------------------------|------------------------------------------------|---------------------|--------|-------|---------|
| oligonucleotide                  | CTGA                                           | [M+H] <sup>+</sup>  | 1174.3 | 231.4 | 0.4(6)  |
| oligonucleotide                  | GCAT                                           | [M+H] <sup>+</sup>  | 1174.3 | 229.1 | 0.5(6)  |
| oligonucleotide                  | TCAG                                           | [M+H] <sup>+</sup>  | 1174.3 | 233   | 0.1(6)  |
| oligonucleotide                  | TGCA                                           | [M+H] <sup>+</sup>  | 1174.3 | 230   | 0.3(6)  |
| <b>Carbohydrates<sup>2</sup></b> |                                                |                     |        |       |         |
| carbohydrate                     | B <sub>2</sub> (LNFP1)                         | [M+Na] <sup>+</sup> | 331.0  | 118.6 | 0.5(7)  |
| carbohydrate                     | Y <sub>2</sub> (LNFP2)                         | [M+Na] <sup>+</sup> | 365.1  | 113.5 | 1.3(8)  |
| carbohydrate                     | Y <sub>2</sub> (LNFP1)                         | [M+Na] <sup>+</sup> | 365.1  | 112.8 | 1.3(12) |
| carbohydrate                     | B <sub>2</sub> (P1 penta)                      | [M+Na] <sup>+</sup> | 388.0  | 114.1 | 1.1(5)  |
| carbohydrate                     | <sup>2,4</sup> A <sub>3</sub> (H-type2-LN-LN)  | [M+Na] <sup>+</sup> | 391.1  | 110.9 | 0.5(5)  |
| carbohydrate                     | C <sub>2</sub> (P1 penta)                      | [M+Na] <sup>+</sup> | 406.1  | 118.3 | 2.1(9)  |
| carbohydrate                     | C <sub>2</sub> (Lec-Lec)                       | [M+Na] <sup>+</sup> | 406.1  | 126.1 | 6.1(5)  |
| carbohydrate                     | C <sub>2</sub> (GNLNLN)                        | [M+Na] <sup>+</sup> | 406.1  | 115.3 | 0.1(5)  |
| carbohydrate                     | C <sub>2</sub> (LNT)                           | [M+Na] <sup>+</sup> | 406.1  | 119.4 | 1.5(5)  |
| carbohydrate                     | <sup>2,4</sup> A <sub>3</sub> (P1 antigen)     | [M+Na] <sup>+</sup> | 407.0  | 119.0 | 3.7(5)  |
| carbohydrate                     | <sup>2,4</sup> A <sub>3</sub> (Galα3-type1)    | [M+Na] <sup>+</sup> | 407.3  | 118.5 | 0.6(8)  |
| carbohydrate                     | Y <sub>3</sub> &C <sub>3</sub> (LNFP1)         | [M+Na] <sup>+</sup> | 409.4  | 125.6 | 1.4(9)  |
| carbohydrate                     | Y <sub>3β</sub> &C <sub>2</sub> (LNFP2)        | [M+Na] <sup>+</sup> | 409.4  | 139.5 | 2.4(9)  |
| carbohydrate                     | Y <sub>2</sub> (P1 antigen)                    | [M+Na] <sup>+</sup> | 434.0  | 131.0 | 1.4(5)  |
| carbohydrate                     | <sup>0,3</sup> A <sub>3</sub> (P1)             | [M+Na] <sup>+</sup> | 437.0  | 135.3 | 0.9(5)  |
| carbohydrate                     | Y <sub>2</sub> -N <sub>2</sub> (H-type2-LN-LN) | [M+Na] <sup>+</sup> | 438.5  | 135.4 | 1.2(5)  |
| carbohydrate                     | Z <sub>1α</sub> (Di-Le <sup>A</sup> )          | [M+Na] <sup>+</sup> | 441.4  | 138.8 | 0.9(9)  |
| carbohydrate                     | Y <sub>2</sub> -N <sub>2</sub> (Lec-Lec)       | [M+Na] <sup>+</sup> | 447.4  | 134.5 | 2.1(12) |
| carbohydrate                     | Y <sub>2</sub> -N <sub>2</sub> (GNLNLN)        | [M+Na] <sup>+</sup> | 447.4  | 131.2 | 1.4(5)  |
| carbohydrate                     | Y <sub>2</sub> -N <sub>2</sub> (P1 penta)      | [M+Na] <sup>+</sup> | 447.4  | 134.1 | 0.3(8)  |
| carbohydrate                     | Y <sub>2</sub> -N <sub>2</sub> (P1)            | [M+Na] <sup>+</sup> | 447.4  | 131.0 | 0.8(8)  |
| carbohydrate                     | <sup>2,4</sup> A <sub>3</sub> (LNT)            | [M+Na] <sup>+</sup> | 448.4  | 124.0 | 0.9(14) |
| carbohydrate                     | <sup>2,4</sup> A <sub>3</sub> (GNLNLN)         | [M+Na] <sup>+</sup> | 448.4  | 115.1 | 0.5(8)  |
| carbohydrate                     | <sup>1,3</sup> A <sub>3</sub> (Galα3-type1)    | [M+Na] <sup>+</sup> | 448.4  | 128.0 | 2.0(5)  |
| carbohydrate                     | <sup>2,4</sup> A <sub>3</sub> (P1 penta)       | [M+Na] <sup>+</sup> | 448.4  | 135.1 | 1.3(5)  |

|              |                                                             |                     |       |       |         |
|--------------|-------------------------------------------------------------|---------------------|-------|-------|---------|
| carbohydrate | <sup>0,2</sup> A <sub>2α</sub> (Di-Le <sup>A</sup> )        | [M+Na] <sup>+</sup> | 451.0 | 132.2 | 3.1(5)  |
| carbohydrate | <sup>0,2</sup> A <sub>3</sub> (H-type2-LN-LN)               | [M+Na] <sup>+</sup> | 451.0 | 131.1 | 0.6(5)  |
| carbohydrate | Z <sub>2</sub> (P1)                                         | [M+Na] <sup>+</sup> | 457.0 | 137.6 | 2.1(5)  |
| carbohydrate | Z <sub>2</sub> (Galα3-type1)                                | [M+Na] <sup>+</sup> | 457.0 | 122.3 | 1.0(7)  |
| carbohydrate | Z <sub>2</sub> (P1)                                         | [M+Na] <sup>+</sup> | 457.0 | 106.7 | 0.5(5)  |
| carbohydrate | Z <sub>2</sub> (GNLNLN)                                     | [M+Na] <sup>+</sup> | 457.0 | 107.7 | 1.3(5)  |
| carbohydrate | Y <sub>1α</sub> (Di-Le <sup>A</sup> )                       | [M+Na] <sup>+</sup> | 459.4 | 110.7 | 0.8(5)  |
| carbohydrate | <sup>1,5</sup> X <sub>2</sub> (P1 antigen)                  | [M+Na] <sup>+</sup> | 462.0 | 131.2 | 0.8(5)  |
| carbohydrate | <sup>0,2</sup> A <sub>3</sub> (Galα3-type1)                 | [M+Na] <sup>+</sup> | 467.4 | 132.5 | 0.6(5)  |
| carbohydrate | Y <sub>2</sub> (LNT)                                        | [M+Na] <sup>+</sup> | 475.4 | 102.5 | 0.5(5)  |
| carbohydrate | Y <sub>2</sub> (P1)                                         | [M+Na] <sup>+</sup> | 475.4 | 136.9 | 0.8(5)  |
| carbohydrate | Y <sub>2</sub> (Lec-Lec)                                    | [M+Na] <sup>+</sup> | 475.4 | 138.0 | 1.3(5)  |
| carbohydrate | Y <sub>2</sub> (Galα3-type1)                                | [M+Na] <sup>+</sup> | 475.4 | 133.8 | 0.6(7)  |
| carbohydrate | Y <sub>2</sub> (P1 penta)                                   | [M+Na] <sup>+</sup> | 475.4 | 135.3 | 3.5(7)  |
| carbohydrate | <sup>1,5</sup> X <sub>1α</sub> (Di-Le <sup>A</sup> )        | [M+Na] <sup>+</sup> | 487.4 | 132.0 | 2.5(8)  |
| carbohydrate | <sup>0,2</sup> X <sub>2</sub> -N <sub>2</sub> (P1 antigen)  | [M+Na] <sup>+</sup> | 489.0 | 151.9 | 3.1(5)  |
| carbohydrate | <sup>1,5</sup> X <sub>2</sub> (Galα3-type1)                 | [M+Na] <sup>+</sup> | 503.4 | 144.8 | 3.5(8)  |
| carbohydrate | <sup>1,5</sup> X <sub>2</sub> (Lec-Lec)                     | [M+Na] <sup>+</sup> | 503.4 | 152.3 | 3.8(5)  |
| carbohydrate | <sup>1,5</sup> X <sub>2</sub> (GNLNLN)                      | [M+Na] <sup>+</sup> | 503.4 | 127.0 | 18.6(5) |
| carbohydrate | <sup>1,5</sup> X <sub>2</sub> (LNT)                         | [M+Na] <sup>+</sup> | 503.4 | 108.1 | 0.7(5)  |
| carbohydrate | <sup>1,5</sup> X <sub>2</sub> (H-type2-LN-LN)               | [M+Na] <sup>+</sup> | 503.4 | 137.9 | 2.6(5)  |
| carbohydrate | <sup>1,5</sup> A <sub>3</sub> (P1)                          | [M+Na] <sup>+</sup> | 522.5 | 135.9 | 0.1(5)  |
| carbohydrate | <sup>1,5</sup> A <sub>3</sub> (Galα3-type1)                 | [M+Na] <sup>+</sup> | 522.5 | 135.2 | 1.3(5)  |
| carbohydrate | <sup>0,2</sup> X <sub>2</sub> -N <sub>2</sub> (LNT)         | [M+Na] <sup>+</sup> | 531.0 | 122.1 | 1.5(5)  |
| carbohydrate | B <sub>3</sub> (H-type2-LN-LN)                              | [M+Na] <sup>+</sup> | 534.5 | 142.9 | 0.3(5)  |
| carbohydrate | B <sub>2</sub> (LNFP2)                                      | [M+Na] <sup>+</sup> | 534.5 | 152.2 | 0.6(5)  |
| carbohydrate | B <sub>3</sub> (LNFP1)                                      | [M+Na] <sup>+</sup> | 534.5 | 151.5 | 0.7(9)  |
| carbohydrate | B <sub>2α</sub> (Di-Le <sup>A</sup> )                       | [M+Na] <sup>+</sup> | 534.5 | 145.8 | 2(8)    |
| carbohydrate | <sup>3,5</sup> X <sub>1</sub> -N <sub>2</sub> (Galα3-type1) | [M+Na] <sup>+</sup> | 535.0 | 145.5 | 1.8(5)  |
| carbohydrate | <sup>0,3</sup> X <sub>0</sub> (Galα3-type1)                 | [M+Na] <sup>+</sup> | 547.5 | 153.5 | 3.9(6)  |

|              |                                                         |                     |       |       |         |
|--------------|---------------------------------------------------------|---------------------|-------|-------|---------|
| carbohydrate | Z <sub>3β</sub> &C <sub>3</sub> (LNFP2)                 | [M+Na] <sup>+</sup> | 547.6 | 165.6 | 4.1(5)  |
| carbohydrate | B <sub>3</sub> (Lec-Lec)                                | [M+Na] <sup>+</sup> | 550.0 | 148.0 | 2.3(16) |
| carbohydrate | B <sub>3</sub> (LNT)                                    | [M+Na] <sup>+</sup> | 550.0 | 145.5 | 0.4(5)  |
| carbohydrate | B <sub>3</sub> (P1 penta)                               | [M+Na] <sup>+</sup> | 550.0 | 150.6 | 0.3(13) |
| carbohydrate | B <sub>3</sub> (P1 antigen)                             | [M+Na] <sup>+</sup> | 550.0 | 145.2 | 4.0(10) |
| carbohydrate | B <sub>3</sub> (Galα3-type1)                            | [M+Na] <sup>+</sup> | 552.5 | 142.7 | 0.6(5)  |
| carbohydrate | C <sub>2α</sub> (Di-Le <sup>A</sup> )                   | [M+Na] <sup>+</sup> | 552.5 | 149.4 | 1.3(9)  |
| carbohydrate | C <sub>2</sub> (LNFP2)                                  | [M+Na] <sup>+</sup> | 552.5 | 151.3 | 0.9(5)  |
| carbohydrate | C <sub>3</sub> (LNFP1)                                  | [M+Na] <sup>+</sup> | 552.5 | 134.1 | 1.6(9)  |
| carbohydrate | B <sub>3</sub> (P1)                                     | [M+Na] <sup>+</sup> | 552.5 | 109.0 | 1.0(5)  |
| carbohydrate | C <sub>3</sub> (H-type2-LN-LN)                          | [M+Na] <sup>+</sup> | 552.5 | 148.3 | 2.2(5)  |
| carbohydrate | <sup>3,5</sup> X <sub>1</sub> (Galα3-type1)             | [M+Na] <sup>+</sup> | 563.0 | 126.8 | 0.7(5)  |
| carbohydrate | C <sub>3</sub> (LNT)                                    | [M+Na] <sup>+</sup> | 568.5 | 150.7 | 1.9(5)  |
| carbohydrate | C <sub>3</sub> (P1 antigen)                             | [M+Na] <sup>+</sup> | 568.5 | 148.6 | 1.2(6)  |
| carbohydrate | C <sub>3</sub> (Lec-Lec)                                | [M+Na] <sup>+</sup> | 568.5 | 152.9 | 2.9(15) |
| carbohydrate | Y <sub>3</sub> (LNFP1)                                  | [M+Na] <sup>+</sup> | 568.5 | 157.4 | 0.4(5)  |
| carbohydrate | C <sub>3</sub> (P1 penta)                               | [M+Na] <sup>+</sup> | 568.5 | 153.4 | 0.8(5)  |
| carbohydrate | C <sub>3</sub> (P1)                                     | [M+Na] <sup>+</sup> | 568.5 | 154.3 | 0.8(5)  |
| carbohydrate | C <sub>3</sub> (Galα3-type1)                            | [M+Na] <sup>+</sup> | 568.5 | 153.5 | 3.2(7)  |
| carbohydrate | <sup>2,4</sup> X <sub>2</sub> (P1 antigen)              | [M+Na] <sup>+</sup> | 577.5 | 165.3 | 1.0(5)  |
| carbohydrate | <sup>2,4</sup> X <sub>2</sub> (P1 penta)                | [M+Na] <sup>+</sup> | 577.5 | 160.5 | 0.8(11) |
| carbohydrate | <sup>2,4</sup> X <sub>2</sub> (Galα3-type1)             | [M+Na] <sup>+</sup> | 577.5 | 163.0 | 15.3(5) |
| carbohydrate | <sup>2,4</sup> X <sub>2</sub> -N <sub>2</sub> (LNT)     | [M+Na] <sup>+</sup> | 591.0 | 153.7 | 1.8(7)  |
| carbohydrate | <sup>2,4</sup> X <sub>2</sub> -N <sub>2</sub> (Lec-Lec) | [M+Na] <sup>+</sup> | 591.0 | 158.1 | 1.5(5)  |
| carbohydrate | B <sub>3</sub> (GNLNLN)                                 | [M+Na] <sup>+</sup> | 591.5 | 155.8 | 0.4(10) |
| carbohydrate | Z <sub>3</sub> -N <sub>2</sub> (P1 penta)               | [M+Na] <sup>+</sup> | 591.5 | 146.3 | 0.5(5)  |
| carbohydrate | <sup>2,4</sup> A <sub>3α</sub> (Di-LeA)                 | [M+Na] <sup>+</sup> | 594.5 | 159.8 | 2.2(15) |
| carbohydrate | <sup>2,4</sup> A <sub>3</sub> (LNFP2)                   | [M+Na] <sup>+</sup> | 594.5 | 173.6 | 1.0(5)  |
| carbohydrate | Y <sub>3</sub> -N <sub>2</sub> (P1 penta)               | [M+Na] <sup>+</sup> | 609.0 | 160.1 | 1.7(10) |
| carbohydrate | M-N <sub>2</sub> (Galα3-type1)                          | [M+Na] <sup>+</sup> | 609.6 | 135.4 | 1.4(7)  |

|              |                                                          |                     |       |       |         |
|--------------|----------------------------------------------------------|---------------------|-------|-------|---------|
| carbohydrate | M-N <sub>2</sub> (P1)                                    | [M+Na] <sup>+</sup> | 609.6 | 155.2 | 0.9(8)  |
| carbohydrate | C <sub>3</sub> (GNLNLN)                                  | [M+Na] <sup>+</sup> | 610.5 | 161.7 | 0.3(5)  |
| carbohydrate | <sup>2,4</sup> A <sub>4</sub> (Lec-Lec)                  | [M+Na] <sup>+</sup> | 610.5 | 162.2 | 0.5(5)  |
| carbohydrate | <sup>2,4</sup> A <sub>4</sub> (LNT)                      | [M+Na] <sup>+</sup> | 610.5 | 163.4 | 1.3(7)  |
| carbohydrate | <sup>2,4</sup> A <sub>4</sub> (P1 antigen)               | [M+Na] <sup>+</sup> | 610.5 | 156.7 | 0.3(5)  |
| carbohydrate | <sup>2,4</sup> X <sub>2</sub> (LNT)                      | [M+Na] <sup>+</sup> | 619.0 | 169.9 | 2.3(5)  |
| carbohydrate | <sup>3,5</sup> A <sub>4</sub> (LNT)                      | [M+Na] <sup>+</sup> | 624.0 | 123.6 | 0.8(5)  |
| carbohydrate | Z <sub>3</sub> -N <sub>2</sub> (GNLNLN)                  | [M+Na] <sup>+</sup> | 633.1 | 170.1 | 2.1(5)  |
| carbohydrate | Z <sub>3</sub> -N <sub>2</sub> (Lec-Lec)                 | [M+Na] <sup>+</sup> | 633.1 | 166.2 | 1.3(5)  |
| carbohydrate | Z <sub>3</sub> -N <sub>2</sub> (LNT)                     | [M+Na] <sup>+</sup> | 633.1 | 131.9 | 2.1(5)  |
| carbohydrate | Galα3-type1                                              | [M+Na] <sup>+</sup> | 637.6 | 160.2 | 1.4(45) |
| carbohydrate | P1                                                       | [M+Na] <sup>+</sup> | 637.6 | 166.9 | 1.2(70) |
| carbohydrate | Y <sub>3</sub> (P1 penta)                                | [M+Na] <sup>+</sup> | 637.6 | 170.1 | 1.4(8)  |
| carbohydrate | Y <sub>3</sub> (P1 antigen)                              | [M+Na] <sup>+</sup> | 637.6 | 168.2 | 0.6(5)  |
| carbohydrate | Y <sub>3</sub> -N <sub>2</sub> (GNLNLN)                  | [M+Na] <sup>+</sup> | 651.0 | 173.0 | 1.8(9)  |
| carbohydrate | Y <sub>3</sub> -N <sub>2</sub> (LNT)                     | [M+Na] <sup>+</sup> | 651.0 | 176.2 | 0.6(5)  |
| carbohydrate | Y <sub>3</sub> -N <sub>2</sub> (Lec-Lec)                 | [M+Na] <sup>+</sup> | 651.0 | 171.1 | 2.0(18) |
| carbohydrate | Z <sub>3</sub> (GNLNLN)                                  | [M+Na] <sup>+</sup> | 661.0 | 108.8 | 0.4(5)  |
| carbohydrate | <sup>0,2</sup> A <sub>4</sub> (LNT)                      | [M+Na] <sup>+</sup> | 670.9 | 170.1 | 1.6(7)  |
| carbohydrate | <sup>0,2</sup> A <sub>4</sub> (P1 penta)                 | [M+Na] <sup>+</sup> | 670.9 | 172.2 | 0.1(5)  |
| carbohydrate | Y <sub>3</sub> (GNLNLN)                                  | [M+Na] <sup>+</sup> | 678.7 | 179.0 | 2.9(5)  |
| carbohydrate | Y <sub>3</sub> (Lec-Lec)                                 | [M+Na] <sup>+</sup> | 678.7 | 176.5 | 1.9(8)  |
| carbohydrate | <sup>1,5</sup> A <sub>4</sub> (P1 penta)                 | [M+Na] <sup>+</sup> | 684.0 | 175.7 | 0.5(5)  |
| carbohydrate | <sup>0,2</sup> X <sub>3</sub> -N <sub>2</sub> (LNT)      | [M+Na] <sup>+</sup> | 692.5 | 111.9 | 2.3(5)  |
| carbohydrate | <sup>0,2</sup> X <sub>3</sub> -N <sub>2</sub> (P1 penta) | [M+Na] <sup>+</sup> | 692.5 | 145.6 | 0.4(5)  |
| carbohydrate | B <sub>4</sub> (LNFP1)                                   | [M+Na] <sup>+</sup> | 696.6 | 180.4 | 0.5(10) |
| carbohydrate | B <sub>3α</sub> (Di-Le <sup>A</sup> )                    | [M+Na] <sup>+</sup> | 696.6 | 175.9 | 1.4(14) |
| carbohydrate | B <sub>3</sub> (LNFP2)                                   | [M+Na] <sup>+</sup> | 696.6 | 182.5 | 0.5(5)  |
| carbohydrate | B <sub>4</sub> (H-type2-LN-LN)                           | [M+Na] <sup>+</sup> | 696.6 | 176.9 | 2.5(5)  |
| carbohydrate | <sup>1,5</sup> X <sub>3</sub> (Lec-Lec)                  | [M+Na] <sup>+</sup> | 707.0 | 145.9 | 4.1(5)  |



|              |                                                               |                     |       |       |         |
|--------------|---------------------------------------------------------------|---------------------|-------|-------|---------|
| carbohydrate | <sup>1,5</sup> X <sub>3</sub> (GNLNLN)                        | [M+Na] <sup>+</sup> | 707.0 | 145.7 | 0.3(5)  |
| carbohydrate | <sup>1,5</sup> X <sub>3</sub> (LNT)                           | [M+Na] <sup>+</sup> | 707.0 | 148.1 | 0.5(5)  |
| carbohydrate | B <sub>4</sub> (P1 antigen)                                   | [M+Na] <sup>+</sup> | 713.0 | 166.0 | 1.6(5)  |
| carbohydrate | B <sub>4</sub> (P1 penta)                                     | [M+Na] <sup>+</sup> | 713.0 | 171.4 | 1.9(5)  |
| carbohydrate | C <sub>3α</sub> (Di-Le <sup>A</sup> )                         | [M+Na] <sup>+</sup> | 715.0 | 179.1 | 1.4(8)  |
| carbohydrate | C <sub>3</sub> (LNFP2)                                        | [M+Na] <sup>+</sup> | 715.0 | 183.8 | 1.2(5)  |
| carbohydrate | C <sub>4</sub> (LNFP1)                                        | [M+Na] <sup>+</sup> | 715.0 | 180.5 | 1.9(8)  |
| carbohydrate | C <sub>4</sub> (P1 antigen)                                   | [M+Na] <sup>+</sup> | 731.0 | 169.9 | 1.7(5)  |
| carbohydrate | Y <sub>4</sub> (LNFP1)                                        | [M+Na] <sup>+</sup> | 731.1 | 179.7 | 0.6(5)  |
| carbohydrate | Y <sub>3α</sub> (LNFP2)                                       | [M+Na] <sup>+</sup> | 731.0 | 179.6 | 0.2(5)  |
| carbohydrate | <sup>1,5</sup> X <sub>3α</sub> (LNFP2)                        | [M+Na] <sup>+</sup> | 742.0 | 191.3 | 1.1(5)  |
| carbohydrate | <sup>2,4</sup> X <sub>3</sub> -N <sub>2</sub> (P1 penta)      | [M+Na] <sup>+</sup> | 752.0 | 175.4 | 1.1(5)  |
| carbohydrate | <sup>2,4</sup> X <sub>3</sub> -N <sub>2</sub> (H-type2-LN-LN) | [M+Na] <sup>+</sup> | 752.0 | 180.0 | 1.0(5)  |
| carbohydrate | B <sub>4</sub> (Lec-Lec)                                      | [M+Na] <sup>+</sup> | 754.0 | 178.7 | 2.2(14) |
| carbohydrate | B <sub>4</sub> (LNT)                                          | [M+Na] <sup>+</sup> | 754.0 | 179.2 | 1.1(5)  |
| carbohydrate | B <sub>4</sub> (GNLNLN)                                       | [M+Na] <sup>+</sup> | 754.0 | 183.9 | 0.9(5)  |
| carbohydrate | <sup>0,2</sup> X <sub>3α</sub> (LNFP2)                        | [M+Na] <sup>+</sup> | 756.7 | 190.3 | 0.7(5)  |
| carbohydrate | <sup>2,4</sup> A <sub>5</sub> (LNFP1)                         | [M+Na] <sup>+</sup> | 756.7 | 192.6 | 0.6(7)  |
| carbohydrate | <sup>1,5</sup> X <sub>4</sub> (LNFP1)                         | [M+Na] <sup>+</sup> | 758.6 | 195.9 | 1.3(5)  |
| carbohydrate | C <sub>4</sub> (LNT)                                          | [M+Na] <sup>+</sup> | 772.0 | 180.1 | 1.6(10) |
| carbohydrate | C <sub>4</sub> (Lec-Lec)                                      | [M+Na] <sup>+</sup> | 772.0 | 176.4 | 1.6(10) |
| carbohydrate | <sup>2,4</sup> A <sub>5</sub> (P1 penta)                      | [M+Na] <sup>+</sup> | 772.0 | 173.6 | 1.6(5)  |
| carbohydrate | <sup>2,4</sup> A <sub>5</sub> (P1 antigen)                    | [M+Na] <sup>+</sup> | 773.0 | 176.8 | 0.4(5)  |
| carbohydrate | Z <sub>4</sub> (P1 antigen)                                   | [M+Na] <sup>+</sup> | 782.0 | 150.1 | 1.1(5)  |
| carbohydrate | Y <sub>4</sub> (P1 antigen)                                   | [M+Na] <sup>+</sup> | 800.0 | 111.9 | 1.2(5)  |
| carbohydrate | M-N <sub>2</sub> (LNT)                                        | [M+Na] <sup>+</sup> | 812.8 | 189.3 | 0.3(7)  |
| carbohydrate | M-N <sub>2</sub> (Lec-Lec)                                    | [M+Na] <sup>+</sup> | 812.8 | 180.2 | 1.9(20) |
| carbohydrate | Y <sub>4</sub> -N <sub>2</sub> (GNLNLN)                       | [M+Na] <sup>+</sup> | 813.0 | 191.5 | 0.9(8)  |
| carbohydrate | Y <sub>4</sub> -N <sub>2</sub> (H-type2-LN-LN)                | [M+Na] <sup>+</sup> | 813.0 | 191.0 | 1.6(7)  |
| carbohydrate | Y <sub>4</sub> -N <sub>2</sub> (P1 penta)                     | [M+Na] <sup>+</sup> | 813.0 | 178.1 | 0.7(8)  |

|              |                                                        |                     |        |       |          |
|--------------|--------------------------------------------------------|---------------------|--------|-------|----------|
| carbohydrate | <sup>2,4</sup> A <sub>5</sub> (GNLNLN)                 | [M+Na] <sup>+</sup> | 814.0  | 191.5 | 1.8(5)   |
| carbohydrate | <sup>0,2</sup> A <sub>5</sub> (P1 penta)               | [M+Na] <sup>+</sup> | 833.5  | 182.9 | 0.4(5)   |
| carbohydrate | <sup>0,2</sup> A <sub>5</sub> (P1 antigen)             | [M+Na] <sup>+</sup> | 833.5  | 185.0 | 1.2(5)   |
| carbohydrate | B <sub>1</sub> (3'SLN-Lec)                             | [M+Na] <sup>+</sup> | 840.8  | 188.0 | 0.9(5)   |
| carbohydrate | LNT                                                    | [M+Na] <sup>+</sup> | 840.8  | 195.9 | 1.4(42)  |
| carbohydrate | Lec-Lec                                                | [M+Na] <sup>+</sup> | 840.8  | 183.2 | 1.6(51)  |
| carbohydrate | Y <sub>4</sub> (GNLNLN)                                | [M+Na] <sup>+</sup> | 841.2  | 198.5 | 1.0(5)   |
| carbohydrate | Y <sub>4</sub> (P1 penta)                              | [M+Na] <sup>+</sup> | 841.2  | 184.2 | 0.7(10)  |
| carbohydrate | Y <sub>4</sub> (H-type2-LN-LN)                         | [M+Na] <sup>+</sup> | 841.2  | 199.3 | 0.5(5)   |
| carbohydrate | <sup>0,2</sup> A <sub>5</sub> (GNLNLN)                 | [M+Na] <sup>+</sup> | 874.0  | 172.6 | 2.0(8)   |
| carbohydrate | B <sub>5</sub> (P1 antigen)                            | [M+Na] <sup>+</sup> | 875.0  | 188.1 | 1.7(5)   |
| carbohydrate | LNFP1                                                  | [M+Na] <sup>+</sup> | 876.8  | 204.4 | 1.4(162) |
| carbohydrate | LNFP2                                                  | [M+Na] <sup>+</sup> | 876.8  | 201.3 | 1.2(181) |
| carbohydrate | LNFP3                                                  | [M+Na] <sup>+</sup> | 876.8  | 199.2 | 1.0(17)  |
| carbohydrate | LNFP5                                                  | [M+Na] <sup>+</sup> | 876.8  | 201.8 | 0.7(18)  |
| carbohydrate | C <sub>5</sub> (P1 antigen)                            | [M+Na] <sup>+</sup> | 893.0  | 194.4 | 0.8(7)   |
| carbohydrate | <sup>0,2</sup> X <sub>4</sub> -N <sub>2</sub> (GNLNLN) | [M+Na] <sup>+</sup> | 896.0  | 147.4 | 0.6(5)   |
| carbohydrate | B <sub>5</sub> (H-type2-LN-LN)                         | [M+Na] <sup>+</sup> | 900.0  | 207.7 | 0.7(5)   |
| carbohydrate | B <sub>5</sub> (P1 penta)                              | [M+Na] <sup>+</sup> | 915.0  | 197.0 | 2.1(8)   |
| carbohydrate | C <sub>5</sub> (H-type2-LN-LN)                         | [M+Na] <sup>+</sup> | 918.0  | 201.4 | 4.0(5)   |
| carbohydrate | C <sub>5</sub> (P1 penta)                              | [M+Na] <sup>+</sup> | 933.0  | 192.3 | 0.7(8)   |
| carbohydrate | M-N <sub>2</sub> (P1 antigen)                          | [M+Na] <sup>+</sup> | 933.8  | 195.8 | 1.3(15)  |
| carbohydrate | <sup>2,4</sup> X <sub>4</sub> -N <sub>2</sub> (GNLNLN) | [M+Na] <sup>+</sup> | 956.0  | 214.4 | 1.2(5)   |
| carbohydrate | Y <sub>3ja</sub> -N <sub>2</sub> (Di-Le <sup>A</sup> ) | [M+Na] <sup>+</sup> | 959.0  | 211.7 | 1.5(12)  |
| carbohydrate | P1 antigen                                             | [M+Na] <sup>+</sup> | 961.8  | 203.4 | 0.9(18)  |
| carbohydrate | M-N <sub>2</sub> (P1 penta)                            | [M+Na] <sup>+</sup> | 974.5  | 202.6 | 0.7(15)  |
| carbohydrate | C <sub>5</sub> (GNLNLN)                                | [M+Na] <sup>+</sup> | 975.1  | 215.3 | 1.3(11)  |
| carbohydrate | Y <sub>3ja</sub> (Di-Le <sup>A</sup> )                 | [M+Na] <sup>+</sup> | 987.0  | 217.5 | 1.8(20)  |
| carbohydrate | α-cyclodextrin                                         | [M+Na] <sup>+</sup> | 995.6  | 200.7 | 0.5(5)   |
| carbohydrate | P1 penta                                               | [M+Na] <sup>+</sup> | 1002.4 | 206.2 | 0.6(30)  |

|                           |                                                |                     |        |       |          |
|---------------------------|------------------------------------------------|---------------------|--------|-------|----------|
| carbohydrate              | M-N <sub>2</sub> (GNLNLN)                      | [M+Na] <sup>+</sup> | 1015.9 | 220.6 | 2.3(24)  |
| carbohydrate              | Y <sub>5</sub> -N <sub>2</sub> (H-type2-LN-LN) | [M+Na] <sup>+</sup> | 1016.0 | 220.3 | 2.7(5)   |
| carbohydrate              | LNDFH1                                         | [M+Na] <sup>+</sup> | 1022.9 | 225.6 | 1.1(18)  |
| carbohydrate              | LNDFH2                                         | [M+Na] <sup>+</sup> | 1022.9 | 220.6 | 1.0(18)  |
| carbohydrate              | GNLNLN                                         | [M+Na] <sup>+</sup> | 1043.9 | 230.5 | 0.8(25)  |
| carbohydrate              | B <sub>4</sub> (Di-Le <sup>A</sup> )           | [M+Na] <sup>+</sup> | 1046.8 | 234.9 | 3.0(6)   |
| carbohydrate              | C <sub>4</sub> (Di-Le <sup>A</sup> )           | [M+Na] <sup>+</sup> | 1064.4 | 230.2 | 3.3(11)  |
| carbohydrate              | M-N <sub>2</sub> (Di-Le <sup>A</sup> )         | [M+Na] <sup>+</sup> | 1105.1 | 231.5 | 0.5(10)  |
| carbohydrate              | Di-Le <sup>A</sup>                             | [M+Na] <sup>+</sup> | 1133.4 | 241.9 | 0.56(23) |
| carbohydrate              | β-cyclodextrin                                 | [M+Na] <sup>+</sup> | 1157.0 | 231.4 | 0.6(5)   |
| carbohydrate              | Y <sub>6</sub> -N <sub>2</sub> (H-type2-LN-LN) | [M+Na] <sup>+</sup> | 1178.0 | 232.3 | 0.7(5)   |
| carbohydrate              | <sup>0,2</sup> A <sub>7</sub> (H-type2-LN-LN)  | [M+Na] <sup>+</sup> | 1182.0 | 231.7 | 2.0(5)   |
| carbohydrate              | Tri-LacNAc                                     | [M+Na] <sup>+</sup> | 1206.0 | 232.6 | 0.6(5)   |
| carbohydrate              | Y <sub>6</sub> (H-type2-LN-LN)                 | [M+Na] <sup>+</sup> | 1206.4 | 239.3 | 0.3(5)   |
| carbohydrate              | C <sub>7</sub> (H-type2-LN-LN)                 | [M+Na] <sup>+</sup> | 1283.2 | 243.8 | 0.7(5)   |
| carbohydrate              | M-N <sub>2</sub> (H-type2-LN-LN)               | [M+Na] <sup>+</sup> | 1324.2 | 245.5 | 0.4(7)   |
| carbohydrate              | H-type2-LN-LN                                  | [M+Na] <sup>+</sup> | 1352.2 | 252.1 | 0.6(7)   |
| <b>Lipids<sup>3</sup></b> |                                                |                     |        |       |          |
| lipid                     | PE 34:2                                        | [M+H] <sup>+</sup>  | 716.5  | 206.9 | 2.0(29)  |
| lipid                     | PE 34:1                                        | [M+H] <sup>+</sup>  | 718.5  | 205.8 | 4.3(29)  |
| lipid                     | SM (36:1)                                      | [M+H] <sup>+</sup>  | 731.6  | 221.1 | 2.0(33)  |
| lipid                     | PE 34:2                                        | [M+Na] <sup>+</sup> | 738.5  | 213.5 | 2.1(29)  |
| lipid                     | PE 34:1                                        | [M+Na] <sup>+</sup> | 740.5  | 214.7 | 1.5(29)  |
| lipid                     | SM (36:1)                                      | [M+Na] <sup>+</sup> | 753.6  | 221.3 | 2.6(33)  |
| lipid                     | PC 34:2                                        | [M+H] <sup>+</sup>  | 758.6  | 217.4 | 3.2(33)  |
| lipid                     | SM (38:1)                                      | [M+H] <sup>+</sup>  | 759.7  | 229.8 | 3.4(33)  |
| lipid                     | PC 34:1                                        | [M+H] <sup>+</sup>  | 760.6  | 219.1 | 2.7(33)  |
| lipid                     | PE 36:4                                        | [M+Na] <sup>+</sup> | 762.5  | 214.4 | 1.6(29)  |
| lipid                     | PE 36:2                                        | [M+Na] <sup>+</sup> | 766.5  | 220.9 | 2.7(29)  |
| lipid                     | PE 36:1                                        | [M+Na] <sup>+</sup> | 768.6  | 221.7 | 4.8(29)  |

|       |            |                     |       |       |         |
|-------|------------|---------------------|-------|-------|---------|
| lipid | PC 34:2    | [M+Na] <sup>+</sup> | 780.6 | 218.9 | 2.8(33) |
| lipid | SM (38:1)  | [M+Na] <sup>+</sup> | 781.6 | 231.3 | 2.5(33) |
| lipid | PC 34:1    | [M+Na] <sup>+</sup> | 782.6 | 221.7 | 3.2(33) |
| lipid | PC 36:2    | [M+H] <sup>+</sup>  | 786.6 | 222.6 | 2.2(33) |
| lipid | SM (40:1)  | [M+H] <sup>+</sup>  | 787.7 | 232.2 | 5.0(33) |
| lipid | PE 38:5    | [M+Na] <sup>+</sup> | 788.5 | 220.6 | 5.2(29) |
| lipid | PC 36:1    | [M+H] <sup>+</sup>  | 788.6 | 227.4 | 4.3(33) |
| lipid | PE 38:4    | [M+Na] <sup>+</sup> | 790.5 | 228.1 | 3.6(29) |
| lipid | CB (40:1)  | [M+Na] <sup>+</sup> | 806.6 | 232.9 | 2.4(33) |
| lipid | PC 36:2    | [M+Na] <sup>+</sup> | 808.6 | 226.7 | 4.6(33) |
| lipid | CB (39:1)h | [M+Na] <sup>+</sup> | 808.6 | 236.6 | 2.9(33) |
| lipid | PS 36:2    | [M+Na] <sup>+</sup> | 810.5 | 217.1 | 5.5(29) |
| lipid | PC 36:1    | [M+Na] <sup>+</sup> | 810.6 | 228.1 | 2.0(33) |
| lipid | PS 36:1    | [M+Na] <sup>+</sup> | 812.5 | 222.6 | 2.4(29) |
| lipid | SM (42:2)  | [M+H] <sup>+</sup>  | 813.7 | 241.8 | 2.5(33) |
| lipid | SM (42:1)  | [M+H] <sup>+</sup>  | 815.7 | 242.1 | 6.3(33) |
| lipid | CB (40:2)h | [M+Na] <sup>+</sup> | 820.6 | 236.2 | 5.6(33) |
| lipid | CB (40:1)h | [M+Na] <sup>+</sup> | 822.6 | 234.6 | 5.3(33) |
| lipid | CB (42:6)  | [M+Na] <sup>+</sup> | 824.6 | 237.9 | 1.9(33) |
| lipid | CB (42:2)  | [M+Na] <sup>+</sup> | 832.7 | 238.8 | 1.7(33) |
| lipid | PS 38:4    | [M+Na] <sup>+</sup> | 834.5 | 225.5 | 2.1(29) |
| lipid | CB (42:1)  | [M+Na] <sup>+</sup> | 834.7 | 239.3 | 2.6(33) |
| lipid | SM (42:2)  | [M+Na] <sup>+</sup> | 835.7 | 239.4 | 2.8(33) |
| lipid | CB (41:1)h | [M+Na] <sup>+</sup> | 836.7 | 240.2 | 3.4(33) |
| lipid | SM (42:1)  | [M+Na] <sup>+</sup> | 837.7 | 239.3 | 4.7(33) |
| lipid | PS 38:1    | [M+Na] <sup>+</sup> | 840.6 | 222.6 | 5.5(29) |
| lipid | CB (42:3)h | [M+Na] <sup>+</sup> | 846.6 | 238.8 | 2.2(33) |
| lipid | CB (42:2)h | [M+Na] <sup>+</sup> | 848.7 | 240.3 | 2.7(33) |
| lipid | CB (44:7)  | [M+Na] <sup>+</sup> | 850.6 | 242.8 | 1.9(33) |
| lipid | CB (44:6)  | [M+Na] <sup>+</sup> | 852.6 | 243.3 | 3.7(33) |
| lipid | PS 40:6    | [M+Na] <sup>+</sup> | 858.5 | 231.9 | 2.8(29) |
| lipid | CB (44:2)  | [M+Na] <sup>+</sup> | 860.7 | 245.9 | 5.2(33) |
| lipid | CB (44:1)  | [M+Na] <sup>+</sup> | 862.7 | 244.3 | 5.5(33) |

|       |            |                     |       |       |         |
|-------|------------|---------------------|-------|-------|---------|
| lipid | CB (44:8)h | [M+Na] <sup>+</sup> | 864.6 | 245.2 | 2.9(33) |
| lipid | CB (44:7)h | [M+Na] <sup>+</sup> | 866.6 | 252.2 | 5.1(33) |
| lipid | SM (44:1)  | [M+Na] <sup>+</sup> | 866.7 | 247.9 | 4.3(33) |
| lipid | CB (44:2)h | [M+Na] <sup>+</sup> | 876.7 | 246.7 | 3.7(33) |
| lipid | PS 42:9    | [M+Na] <sup>+</sup> | 880.5 | 238   | 1.7(29) |
| lipid | PS 42:8    | [M+Na] <sup>+</sup> | 882.5 | 230.8 | 3.0(29) |
| lipid | PC 42:1    | [M+Na] <sup>+</sup> | 894.7 | 238.2 | 2.3(33) |
| lipid | PC 42:0    | [M+Na] <sup>+</sup> | 896.7 | 246.3 | 2.1(33) |

Footnotes on table nomenclature:

1. Oligonucleotide nomenclature:

G - Guanine  
 A - Adenine  
 C - Cytosine  
 T - Thymine

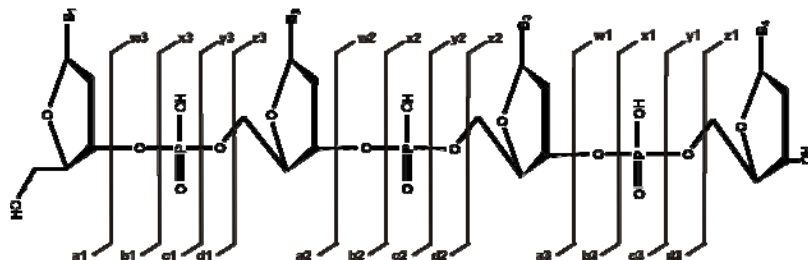

**Scheme S1.** Oligonucleotide fragmentation is specified in McLuckey nomenclature (McLuckey SA, Habibi-Goudarzi S. (1993) J. Am. Chem. Soc. 115: 12085-12095). In this table, tentative fragment ion assignments are given by the predominant fragmentation channels observed previously.

## 2. Carbohydrate nomenclature:

|                    |                                                      |
|--------------------|------------------------------------------------------|
| LNFP1              | Fuca1-2Galβ1-3GlcNAcβ1-3Galβ1-4Glc                   |
| LNFP2              | Galβ1-3[Fuca1-4]GlcNAcβ1-3Galβ1-4Glc                 |
| LNFP3              | Galβ1-4[Fuca1-3]GlcNAcβ1-3Galβ1-4Glc                 |
| LNFP5              | Galβ1-3GlcNAcβ1-3Galβ1-4[Fuca1-3]Glc                 |
| LNDFH1             | Fuca1-2Galβ1-3[Fuca1-4]GlcNAcβ1-3Galβ1-4Glc          |
| LNDFH2             | Galβ1-3[Fuca1-4]GlcNAcβ1-3Galβ1-4[Fuca1-3]Glc        |
| Galα3-type1        | Galα1-3Galβ1-3GlcNAcβ-Sp                             |
| P1                 | Galα1-4Galβ1-4GlcNAcβ-Sp                             |
| P1 penta           | Galβ1-3GalNAcβ1-3Galα1-4Galβ1-4GlcNAcβ-Sp            |
| H-type2-LN-LN      | Fuca1-2(Galβ1-4GlcNAcβ1-3) <sub>3</sub> β-Sp         |
| Lec-Lec            | Galβ1-3GlcNAcβ1-3Galβ1-3GlcNAcβ-Sp                   |
| GNLNLN             | GlcNAcβ1-3(Galβ1-4GlcNAcβ1-3) <sub>2</sub> β-Sp      |
| LNT                | Galβ1-3GlcNAcβ1-3Galβ1-4GlcNAcβ-Sp                   |
| P1 antigen         | Galα1-4Galβ1-4GlcNAcβ1-3Galβ1-4Glcβ-Sp               |
| Di-Le <sup>A</sup> | Galβ1-3[Fuca1-4]GlcNAcβ1-3Galβ1-3[Fuca1-4]GlcNAcβ-Sp |
| 3'SLN-Lec          | Neu5Acα2-3Galβ1-4GlcNAcβ1-3Galβ1-3GlcNAcβ-Sp         |
| Tri-LacNAc         | (Galβ1-4GlcNAcβ1-3) <sub>3</sub> β-Sp                |
| α-cyclodextrin     | Cyclomaltohexaose                                    |
| β-cyclodextrin     | Cyclomaltoheptaose                                   |

Fuc - Fucose

Gal - Galactose

Glc - Glucose

GlcNAc - N-acetylglucosamine

GalNAc - N-acetylgalactosamine

Neu5Ac - N-Acetylneuraminic Acid

Sp – alkyne spacer not utilized in these studies but which readily loses N<sub>2</sub> in the MS accounting for some carbohydrate fragment peaks

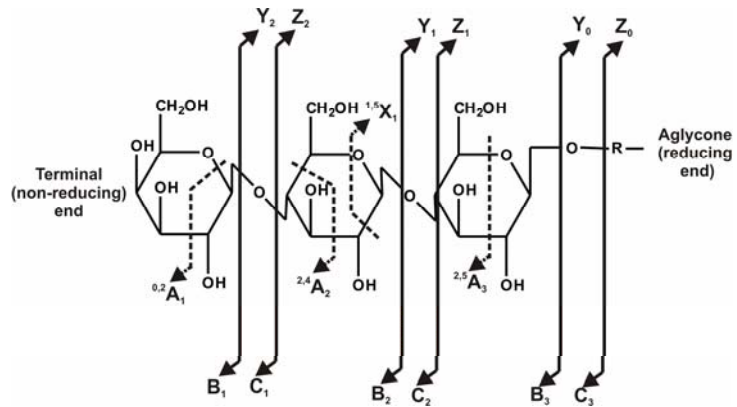

**Scheme S2.** Carbohydrate fragmentation is specified in Domon-Costello nomenclature (Domon B, Costello CE (1988) Glycoconjugate J 5: 397-409)

### 3. Lipid nomenclature :

Glycerophospholipids:

Ex. PC X:Y

PC, PE, PS = abbreviated names phosphatidylcholine, phosphatidylethanolamine, phosphatidylserine.

X = total number of carbons in fatty acid chains

Y = total number of double bonds in fatty acid chains

Sphingolipids:

Ex. SM (x:y)

SM, CB = abbreviated names sphingomyelin, cerebroside

x = total number of carbons in the amide linked fatty acid of the ceramide plus eighteen carbons from the sphingosine backbone  
y = total number of double bonds, one trans double bond in the sphingosine backbone plus the number of double bonds in the amide linked fatty acid of the ceramide

( ) = used to distinguish sphingolipid from glycerophospholipid nomenclature in the table

Hydroxylation on Cerebrosides:

Ex. CB (x:y)h

h = denotes hydroxylation on the number two carbon (from carbonyl) of the amide linked fatty acid.
